# Supplementary material
Source: publisher figshare collection journal article supplement (https://gsapubs.figshare.com/ndownloader/files/34781326)
Supplement: Supplementary file 1 [file 34781326]

## Sheet: Nd and Sm isotope ratios
Data S1A. Concentration and isotope ratios for new bulk rock eNd(t) measured by TIMS
Stratigraphic Height (m)	Unit	Conodont biozone	Age (Ma) (2020 GTS)	[Sm] (ppm)	[Nd] (ppm)	143Nd/144Nd(0)	143Nd/144Nd standard err. of the mean	147Sm/144Nd	143Nd/144Nd(460 Ma)	eNd(460 Ma)
0	Antelope Valley Limestone	Microzarkodina flabellum	471.177	0.474432	3.09844	0.511425	1.20161e-06	0.0925433	0.511139	-17.7011
1.5	Antelope Valley Limestone	Microzarkodina flabellum	471.113	0.501329	3.21637	0.511411	1.08904e-06	0.094204	0.511119	-18.0841
3	Antelope Valley Limestone	Microzarkodina flabellum	471.05	1.2802	7.27984	0.511434	1.09613e-06	0.106285	0.51111	-18.2602
4.5	Antelope Valley Limestone	Microzarkodina flabellum	470.986	0.784867	4.45875	0.51146	1.21122e-06	0.10639	0.511134	-17.8075
6	Antelope Valley Limestone	Microzarkodina flabellum	470.923	0.822238	4.96883	0.511433	1.09909e-06	0.100013	0.511127	-17.9426
7.5	Antelope Valley Limestone	Microzarkodina flabellum	470.859	0.774802	6.1932	0.511397	1.19397e-06	0.0756114	0.511165	-17.1967
9	Antelope Valley Limestone	Microzarkodina flabellum	470.796	0.506981	3.04147	0.511396	1.09456e-06	0.100744	0.511083	-18.7932
10.5	Antelope Valley Limestone	Microzarkodina flabellum	470.732	0.621331	3.75128	0.511408	1.17751e-06	0.100105	0.511099	-18.4881
12	Antelope Valley Limestone	Microzarkodina flabellum	470.669	0.538892	6.78597	0.511431	1.03733e-06	0.1040*	0.511114	-18.1927
16.5	Antelope Valley Limestone	Microzarkodina flabellum	470.479	0.550511	3.39492	0.511376	1.16415e-06	0.0980044	0.511073	-18.9928
18	Antelope Valley Limestone	Microzarkodina flabellum	470.415	0.695043	4.34909	0.511377	8.55798e-07	0.0965878	0.51108	-18.8523
19.5	Antelope Valley Limestone	Histiodella altifrons	470.352	1.04189	6.36899	0.5114	9.38393e-07	0.0988694	0.511098	-18.5073
21	Antelope Valley Limestone	Histiodella altifrons	470.288	1.02344	7.97373	0.511425	1.15342e-06	0.1040*	0.511108	-18.3071
22.5	Antelope Valley Limestone	Histiodella altifrons	470.225	0.785279	5.42527	0.51138	1.30511e-06	0.0874806	0.511111	-18.2382
24	Antelope Valley Limestone	Histiodella altifrons	470.161	0.91675	4.78619	0.511376	1.19112e-06	0.115763	0.51102	-20.0185
25.5	Antelope Valley Limestone	Histiodella altifrons	470.098	0.640985	4.15584	0.511378	1.23151e-06	0.0932176	0.511091	-18.6395
27	Antelope Valley Limestone	Histiodella altifrons	470.034	1.33819	7.02668	0.511395	1.35107e-06	0.115101	0.511044	-19.5512
28.5	Antelope Valley Limestone	Histiodella altifrons	469.971	0.553779	2.9956	0.511426	1.06528e-06	0.111729	0.51108	-18.8582
30	Antelope Valley Limestone	Histiodella altifrons	469.908	0.428365	2.47403	0.511394	9.98689e-07	0.104645	0.511068	-19.0914
31.5	Antelope Valley Limestone	Histiodella altifrons	469.844	1.48515	8.93677	0.511587	9.77598e-07	0.100443	0.511282	-14.9163
33	Antelope Valley Limestone	Histiodella altifrons	469.781	0.764955	4.01933	0.511407	1.06218e-06	0.115025	0.511053	-19.3787
36	Antelope Valley Limestone	Histiodella altifrons	469.654	0.727008	4.07879	0.511413	9.84579e-07	0.107726	0.511081	-18.831
40.5	Antelope Valley Limestone	Histiodella sinuosa	469.463	0.898556	5.40561	0.511392	1.09101e-06	0.100464	0.511085	-18.7634
42	Antelope Valley Limestone	Histiodella sinuosa	469.383	0.5344	3.11878	0.511397	1.07785e-06	0.10356	0.511076	-18.9395
43.5	Antelope Valley Limestone	Histiodella sinuosa	469.265	0.824732	4.98171	0.511328	1.03007e-06	0.100055	0.511021	-20.0118
45	Antelope Valley Limestone	Histiodella sinuosa	469.148	0.669668	3.66891	0.511344	1.17822e-06	0.110313	0.511005	-20.3229
46.5	Antelope Valley Limestone	Histiodella sinuosa	469.03	0.946861	5.11221	0.51138	1.03464e-06	0.111941	0.511037	-19.6856
48	Antelope Valley Limestone	Histiodella sinuosa	468.912	0.646186	3.37547	0.511418	1.01081e-06	0.115701	0.511062	-19.2016
49.5	Antelope Valley Limestone	Histiodella sinuosa	468.795	0.701504	4.25577	0.511335	1.03858e-06	0.0996223	0.511029	-19.8509
51	Antelope Valley Limestone	Histiodella sinuosa	468.677	0.934727	5.19709	0.511378	1.02093e-06	0.108701	0.511045	-19.5273
52.5	Antelope Valley Limestone	Histiodella sinuosa	468.56	0.972751	8.79229	0.511406	9.60774e-07	0.1040*	0.51109	-18.6635
60	Antelope Valley Limestone	Histiodella holodentata	467.972	0.562004	3.29042	0.511397	1.0212e-06	0.103228	0.511078	-18.8934
69	Antelope Valley Limestone	Histiodella holodentata	467.266	0.713576	4.4467	0.511357	1.12674e-06	0.0969862	0.511059	-19.263
75	Antelope Valley Limestone	Histiodella holodentata	466.796	0.845881	5.08431	0.511432	1.04407e-06	0.100552	0.511123	-18.0059
78	Antelope Valley Limestone	Histiodella holodentata	466.561	0.729824	4.08107	0.511422	9.67784e-07	0.108083	0.51109	-18.6663
85.5	Antelope Valley Limestone	Histiodella holodentata	465.973	0.891801	4.91198	0.5114	1.02956e-06	0.109729	0.511063	-19.1761
93	Antelope Valley Limestone	Histiodella holodentata	465.385	0.79508	4.96492	0.511386	9.48317e-07	0.0967852	0.511089	-18.6674
96	Antelope Valley Limestone	Histiodella holodentata	465.149	1.50121	7.97602	0.511404	1.05159e-06	0.113755	0.511058	-19.2909
99	Antelope Valley Limestone	Phragmodus Polonicus	464.914	0.873431	4.86985	0.511378	1.1172e-06	0.108398	0.511045	-19.5359
102	Antelope Valley Limestone	Phragmodus Polonicus	464.679	0.925112	5.12476	0.511389	1.08686e-06	0.109102	0.511054	-19.3559
105	Antelope Valley Limestone	Phragmodus Polonicus	464.444	0.775193	4.25881	0.511395	1.00234e-06	0.11001	0.511057	-19.3065
108	Antelope Valley Limestone	Phragmodus Polonicus	464.209	0.594873	3.33477	0.511393	1.04619e-06	0.107813	0.511059	-19.2622
111	Antelope Valley Limestone	Phragmodus Polonicus	463.946	1.05952	6.19755	0.511362	8.56383e-07	0.103323	0.511046	-19.5176
114	Antelope Valley Limestone	Phragmodus Polonicus	463.666	0.961883	5.39369	0.511389	1.06649e-06	0.107782	0.511059	-19.2709
120	Antelope Valley Limestone	Cahabagnathus friendsvillensis	463.105	0.703624	3.71527	0.511376	8.39748e-07	0.114462	0.511023	-19.9655
126	Antelope Valley Limestone	Cahabagnathus friendsvillensis	462.596	0.707068	3.61495	0.511495	9.84965e-07	0.118217	0.511131	-17.8637
129	Antelope Valley Limestone	Cahabagnathus friendsvillensis	462.366	0.68867	7.67825	0.511458	9.33999e-07	0.1040*	0.511141	-17.6684
153	Copenhagen fm Mb. B + C	Cahabagnathus sweeti	460.259	2.33836	14.7951	0.511626	9.46557e-07	0.0955275	0.511337	-13.8397
156	Copenhagen fm Mb. B + C	Cahabagnathus sweeti	459.933	2.18287	16.5913	0.511657	8.14262e-07	0.0795215	0.511416	-12.2931
162	Copenhagen fm Mb. B + C	Cahabagnathus sweeti	459.281	3.32116	16.0893	0.511736	8.25933e-07	0.124767	0.511358	-13.4186
171	Copenhagen fm Mb. B + C	Cahabagnathus sweeti	458.303	3.27421	34.402	0.511597	9.06633e-07	0.1040*	0.511283	-14.8866
178.5	Copenhagen fm Mb. B + C	Cahabagnathus sweeti	457.693	4.01309	22.1374	0.511693	1.34782e-06	0.109571	0.511361	-13.3556
183	Copenhagen fm Mb. B + C	Cahabagnathus sweeti	457.357	4.29613	34.7251	0.511886	1.18573e-06	0.0747819	0.51166	-7.53384
189	Copenhagen fm Mb. B + C	Cahabagnathus sweeti	457.068	2.22545	11.5173	0.511875	1.58648e-06	0.116796	0.511521	-10.2487
216	Copenhagen fm Mb. B + C	Plectodina aculeata	455.768	3.6263	18.1566	0.511725	1.63219e-06	0.120719	0.51136	-13.3894
222	Copenhagen fm Mb. B + C	Erismodus quadridactylus	455.48	3.67311	22.2668	0.511588	1.67051e-06	0.1040*	0.511273	-15.0741
						* sample ran poorly and did not produce reliable 147Sm/144Nd ratio so the average for the sample set (147Sm/144Nd = 0.0104) was used

## Sheet: Sr isotope ratios
Data S1B. Concentration and isotope ratios for new bulk rock and published conodont 87Sr/86Sr measured by TIMS
Stratigraphic Height (m)	Unit	Conodont biozone	Age (Ma) (2020 GTS)	[Sr] (ppm)	87Sr/86Sr standard err. of the mean	87Sr/86Sr	Ref
0	Anetlope Valley Limestone	Microzarkodina flabellum	471.177	309.979	3.08601e-06	0.708809	This study (bulk rock)
6	Anetlope Valley Limestone	Microzarkodina flabellum	470.923	339.626	2.86823e-06	0.708787	This study (bulk rock)
21	Anetlope Valley Limestone	Histiodella altifrons	470.288	198.1	3.12423e-06	0.708854	This study (bulk rock)
27	Anetlope Valley Limestone	Histiodella altifrons	470.034	182.464	2.75489e-06	0.708755	This study (bulk rock)
49.5	Anetlope Valley Limestone	Histiodella sinuosa	468.795	235.003	2.84715e-06	0.708767	This study (bulk rock)
57	Anetlope Valley Limestone	Histiodella holodentata	468.207	190.197	2.83332e-06	0.708753	This study (bulk rock)
63	Anetlope Valley Limestone	Histiodella holodentata	467.737	171.539	2.78581e-06	0.70871	This study (bulk rock)
69	Anetlope Valley Limestone	Histiodella holodentata	467.266	139.791	2.93944e-06	0.70876	This study (bulk rock)
75	Anetlope Valley Limestone	Histiodella holodentata	466.796	290.989	2.92093e-06	0.70875	This study (bulk rock)
81	Anetlope Valley Limestone	Histiodella holodentata	466.325	169.316	3.04486e-06	0.70884	This study (bulk rock)
93	Anetlope Valley Limestone	Histiodella holodentata	465.385	165.899	3.04359e-06	0.708757	This study (bulk rock)
86.6	Anetlope Valley Limestone	Histiodella holodentata	465.884	12968	1e-05	0.708745	Saltzman et al., 2014 (conodont)
93.92	Anetlope Valley Limestone	Histiodella holodentata	465.252	20532	1.9e-05	0.708772	Saltzman et al., 2014 (conodont)
102.76	Anetlope Valley Limestone	Histiodella holodentata	464.962	17350	1.1e-05	0.708723	Saltzman et al., 2014 (conodont)
109.2	Anetlope Valley Limestone	Phragmodus Polonicus	464.116	20350	6e-06	0.708688	Saltzman et al., 2014 (conodont)
111.95	Anetlope Valley Limestone	Phragmodus Polonicus	463.749	14144	1.1e-05	0.708671	Saltzman et al., 2014 (conodont)
115	Anetlope Valley Limestone	Phragmodus Polonicus	463.358	10875	8e-06	0.70868	Saltzman et al., 2014 (conodont)
118.96	Anetlope Valley Limestone	Cahabagnathus friendsvillensis	463.093	5879	1.2e-05	0.708649	Saltzman et al., 2014 (conodont)
122.9	Anetlope Valley Limestone	Cahabagnathus friendsvillensis	462.828	10961	6e-06	0.708568	Saltzman et al., 2014 (conodont)
139.37	Copenhagen fm Mb. B + C	Cahabagnathus sweeti	461.754	9923	1.3e-05	0.708431	Saltzman et al., 2014 (conodont)
141.5	Copenhagen fm Mb. B + C	Cahabagnathus sweeti	461.527	13005	9e-06	0.708469	Saltzman et al., 2014 (conodont)
144.7	Copenhagen fm Mb. B + C	Cahabagnathus sweeti	461.16	3233	1.7e-05	0.708475	Saltzman et al., 2014 (conodont)
157.81	Copenhagen fm Mb. B + C	Cahabagnathus sweeti	459.733	9418	1e-05	0.708364	Saltzman et al., 2014 (conodont)
177.63	Copenhagen fm Mb. B + C	Cahabagnathus sweeti	457.707	8432	7e-06	0.708287	Saltzman et al., 2014 (conodont)
203.24	Copenhagen fm Mb. B + C	Plectodina aculeata	456.028	2676	1.4e-05	0.708265	Saltzman et al., 2014 (conodont)
203.24	Copenhagen fm Mb. B + C	Plectodina aculeata	456.028	2973	2.1e-05	0.708205	Saltzman et al., 2014 (conodont)
214.83	Copenhagen fm Mb. B + C	Belodina compressa	454.56	7425	1.3e-05	0.708047	Saltzman et al., 2014 (conodont)
261.78	Copenhagen fm Mb. B + C	Phragmodus undatus	453.565	6765	1e-05	0.707994	Saltzman et al., 2014 (conodont)
270.927	Copenhagen fm Mb. B + C	Phragmodus undatus	453.042	6069	1.9e-05	0.707973	Saltzman et al., 2014 (conodont)

## Sheet: O isotope compilation
Data S1C. Compiled d18O measurements shown in Figs. 1C and 2C.
Locality	Age (Ma) (2020 GTS)	d18O corrected*	Std. error of the mean$	Method	Author
Antelope Range	457.365	20.1	0.42	SIMS	Edwards et al., 2021
Antelope Range	457.365	18.8	0.27	SIMS	Edwards et al., 2021					* = Edwards et al., 2021 and Grossman and Joachimski, 2020 applied a −1‰ and −0.6‰ correction, respectively, to their SIMS measurements for proper comparison to TC/EA measurements
Antelope Range	457.365	18.9	0.56	SIMS	Edwards et al., 2021
Antelope Range	458.15	16.4	0.2	SIMS	Edwards et al., 2021
Antelope Range	458.15	17.4	0.4	SIMS	Edwards et al., 2021					$ = Männik et al., 2021 report error as 1-sigma rather than standard error of the mean
Antelope Range	459.203	18.2	0.2	SIMS	Edwards et al., 2021
Antelope Range	459.203	17.8	0.2	SIMS	Edwards et al., 2021
Antelope Range	459.203	18.7	0.22	SIMS	Edwards et al., 2021
Antelope Range	459.203	19.4	0.38	SIMS	Edwards et al., 2021
Antelope Range	459.203	19.3	0.22	SIMS	Edwards et al., 2021
Antelope Range	461.16	16.4	0.18	SIMS	Edwards et al., 2021
Antelope Range	461.16	16.8	0.16	SIMS	Edwards et al., 2021
Antelope Range	461.16	17.2	0.17	SIMS	Edwards et al., 2021
Antelope Range	461.16	17.2	0.3	SIMS	Edwards et al., 2021
Antelope Range	464.116	17.1	0.06	SIMS	Edwards et al., 2021
Antelope Range	464.116	16.1	0.13	SIMS	Edwards et al., 2021
Antelope Range	464.116	16.8	0.15	SIMS	Edwards et al., 2021
Antelope Range	464.962	16	0.29	SIMS	Edwards et al., 2021
Antelope Range	464.962	17.9	0.3	SIMS	Edwards et al., 2021
Antelope Range	464.962	15.9	0.19	SIMS	Edwards et al., 2021
Cincinnati Arch	448.4	20	0.29	SIMS	Edwards et al., 2021
Cincinnati Arch	448.4	19.5	0.42	SIMS	Edwards et al., 2021
Cincinnati Arch	448.4	19.9	0.3	SIMS	Edwards et al., 2021
Cincinnati Arch	448.4	18.2	0.4	SIMS	Edwards et al., 2021
Cincinnati Arch	451.203	19.4	0.3	SIMS	Edwards et al., 2021
Cincinnati Arch	451.3	19.4	0.3	SIMS	Edwards et al., 2021
Cincinnati Arch	451.3	19.2	0.2	SIMS	Edwards et al., 2021
Cincinnati Arch	451.397	19.3	0.3	SIMS	Edwards et al., 2021
Cincinnati Arch	451.397	19.2	0.1	SIMS	Edwards et al., 2021
Cincinnati Arch	451.493	20.6	0.2	SIMS	Edwards et al., 2021
Cincinnati Arch	451.493	19.2	0.2	SIMS	Edwards et al., 2021
Cincinnati Arch	451.3	18.8	0.2	SIMS	Edwards et al., 2021
Cincinnati Arch	451.3	19.3	0.2	SIMS	Edwards et al., 2021
Cincinnati Arch	451.3	19.7	0.3	SIMS	Edwards et al., 2021
Cincinnati Arch	451.3	19.5	0.3	SIMS	Edwards et al., 2021
Cincinnati Arch	451.3	19.3	0.3	SIMS	Edwards et al., 2021
Cincinnati Arch	451.397	19.1	0.2	SIMS	Edwards et al., 2021
Cincinnati Arch	451.493	17	0.5	SIMS	Edwards et al., 2021
Cincinnati Arch	451.493	18.7	0.5	SIMS	Edwards et al., 2021
Cincinnati Arch	451.493	19.3	0.3	SIMS	Edwards et al., 2021
Cincinnati Arch	451.493	20.2	0.3	SIMS	Edwards et al., 2021
Cincinnati Arch	451.493	19.9	0.2	SIMS	Edwards et al., 2021
Oklahoma	464.949	17.8	0.18	SIMS	Edwards et al., 2021
Oklahoma	464.949	17.5	0.24	SIMS	Edwards et al., 2021
Oklahoma	465.606	17.9	0.22	SIMS	Edwards et al., 2021
Oklahoma	466.477	17.1	0.07	SIMS	Edwards et al., 2021
Oklahoma	467.349	18.6	0.11	SIMS	Edwards et al., 2021
Oklahoma	467.349	18	0.22	SIMS	Edwards et al., 2021
Oklahoma	467.349	18.7	0.17	SIMS	Edwards et al., 2021
Oklahoma	467.349	18.6	0.16	SIMS	Edwards et al., 2021
Oklahoma	468.144	17.5	0.11	SIMS	Edwards et al., 2021
Oklahoma	468.144	17.8	0.1	SIMS	Edwards et al., 2021
Oklahoma	468.144	16.9	0.15	SIMS	Edwards et al., 2021
Oklahoma	469.795	16.5	0.21	SIMS	Edwards et al., 2021
Oklahoma	469.795	17.4	0.17	SIMS	Edwards et al., 2021
Oklahoma	470.211	16.9	0.21	SIMS	Edwards et al., 2021
Oklahoma	470.626	17.2	0.14	SIMS	Edwards et al., 2021
Oklahoma	470.626	16.9	0.22	SIMS	Edwards et al., 2021
Oklahoma	470.626	17.8	0.15	SIMS	Edwards et al., 2021
Oklahoma	470.626	17.7	0.15	SIMS	Edwards et al., 2021
Shingle Pass	464.394	16.4	0.23	SIMS	Edwards et al., 2021
Shingle Pass	464.394	16.4	0.27	SIMS	Edwards et al., 2021
Shingle Pass	466.035	16.6	0.13	SIMS	Edwards et al., 2021
Shingle Pass	466.035	16.6	0.24	SIMS	Edwards et al., 2021
Shingle Pass	466.035	16.1	0.17	SIMS	Edwards et al., 2021
Shingle Pass	466.553	17.3	0.17	SIMS	Edwards et al., 2021
Shingle Pass	467.02	18.3	0.15	SIMS	Edwards et al., 2021
Shingle Pass	467.538	18.1	0.24	SIMS	Edwards et al., 2021
Shingle Pass	471.062	16.8	0.08	SIMS	Edwards et al., 2021
Shingle Pass	471.062	15.1	0.22	SIMS	Edwards et al., 2021
Shingle Pass	471.062	15.8	0.22	SIMS	Edwards et al., 2021
Shingle Pass	472.235	14.8	0.42	SIMS	Edwards et al., 2021
Shingle Pass	472.235	12.6	0.41	SIMS	Edwards et al., 2021
Shingle Pass	472.235	16.9	0.38	SIMS	Edwards et al., 2021
Shingle Pass	472.235	16.4	0.43	SIMS	Edwards et al., 2021
Shingle Pass	473.119	14.3	0.3	SIMS	Edwards et al., 2021
Shingle Pass	474.639	14.7	0.12	SIMS	Edwards et al., 2021
Shingle Pass	474.639	15.6	0.23	SIMS	Edwards et al., 2021
Shingle Pass	474.639	15.7	0.15	SIMS	Edwards et al., 2021
Shingle Pass	475.41	14.4	0.25	SIMS	Edwards et al., 2021
Shingle Pass	475.41	13.8	0.05	SIMS	Edwards et al., 2021
Shingle Pass	475.893	13.9	0.16	SIMS	Edwards et al., 2021
Shingle Pass	475.893	14.1	0.24	SIMS	Edwards et al., 2021
Shingle Pass	475.893	12.9	0.21	SIMS	Edwards et al., 2021
Shingle Pass	475.893	15.2	0.26	SIMS	Edwards et al., 2021
Shingle Pass	475.893	14.9	0.29	SIMS	Edwards et al., 2021
Shingle Pass	477.93	13.8	0.3	SIMS	Edwards et al., 2021
Shingle Pass	477.93	14.5	0.34	SIMS	Edwards et al., 2021
Shingle Pass	477.93	14.8	0.25	SIMS	Edwards et al., 2021
Shingle Pass	478.717	14.7	0.36	SIMS	Edwards et al., 2021
Shingle Pass	478.717	13.3	0.28	SIMS	Edwards et al., 2021
Shingle Pass	478.717	14.1	0.29	SIMS	Edwards et al., 2021
Shingle Pass	478.907	14.3	0.21	SIMS	Edwards et al., 2021
Shingle Pass	478.907	14.3	0.21	SIMS	Edwards et al., 2021
Shingle Pass	478.907	14	0.2	SIMS	Edwards et al., 2021
Shingle Pass	479.846	14.4	0.19	SIMS	Edwards et al., 2021
Shingle Pass	479.846	14.9	0.2	SIMS	Edwards et al., 2021
Shingle Pass	479.846	14.8	0.1	SIMS	Edwards et al., 2021
Shingle Pass	480.087	14.6	0.24	SIMS	Edwards et al., 2021
Shingle Pass	480.201	14.8	0.25	SIMS	Edwards et al., 2021
Shingle Pass	480.201	15.9	0.14	SIMS	Edwards et al., 2021
Shingle Pass	480.201	15.8	0.29	SIMS	Edwards et al., 2021
Shingle Pass	480.277	15.3	0.18	SIMS	Edwards et al., 2021
Shingle Pass	480.277	14.9	0.22	SIMS	Edwards et al., 2021
Shingle Pass	480.277	14.5	0.14	SIMS	Edwards et al., 2021
Shingle Pass	487.255	15.5	0.12	SIMS	Edwards et al., 2021
Shingle Pass	487.255	13.6	0.09	SIMS	Edwards et al., 2021
Shingle Pass	487.255	14.7	0.12	SIMS	Edwards et al., 2021
Mehikoorma	458.364	17.6179	0.236814	TC/EA	Männik et al., 2021
Mehikoorma	458.193	18.2971	0.0295498	TC/EA	Männik et al., 2021
Mehikoorma	458.112	17.1836	0.26003	TC/EA	Männik et al., 2021
Mehikoorma	458.004	17.887	0.140103	TC/EA	Männik et al., 2021
Mehikoorma	457.915	17.589	0.202687	TC/EA	Männik et al., 2021
Mehikoorma	457.816	18.5359	0.154765	TC/EA	Männik et al., 2021
Mehikoorma	457.726	17.6879	0.218561	TC/EA	Männik et al., 2021
Mehikoorma	457.591	18.32	0.0425865	TC/EA	Männik et al., 2021
Mehikoorma	457.456	17.9049	0.214807	TC/EA	Männik et al., 2021
Mehikoorma	457.385	18.1245	0.290451	TC/EA	Männik et al., 2021
Mehikoorma	457.196	18.4326	0.17163	TC/EA	Männik et al., 2021
Mehikoorma	457.115	18.23	0.127206	TC/EA	Männik et al., 2021
Mehikoorma	457.021	18.652	0.0198035	TC/EA	Männik et al., 2021
Mehikoorma	456.998	19.4225	0.227062	TC/EA	Männik et al., 2021
Mehikoorma	456.949	18.6712	0.245166	TC/EA	Männik et al., 2021
Mehikoorma	456.908	18.5293	0.183158	TC/EA	Männik et al., 2021
Mehikoorma	456.859	18.6077	0.120716	TC/EA	Männik et al., 2021
Mehikoorma	456.824	18.5581	0.0746199	TC/EA	Männik et al., 2021
Mehikoorma	456.685	18.5042	0.280803	TC/EA	Männik et al., 2021
Mehikoorma	456.603	18.4446	0.0865189	TC/EA	Männik et al., 2021
Mehikoorma	456.528	18.1024	0.11671	TC/EA	Männik et al., 2021
Mehikoorma	456.45	19.3789	0.450838	TC/EA	Männik et al., 2021
Mehikoorma	456.336	18.8452	0.080747	TC/EA	Männik et al., 2021
Mehikoorma	456.275	18.3024		TC/EA	Männik et al., 2021
Mehikoorma	456.215	18.6482	0.17481	TC/EA	Männik et al., 2021
Mehikoorma	456.11	19.0618	0.0135673	TC/EA	Männik et al., 2021
Mehikoorma	456.023	18.8971	0.172657	TC/EA	Männik et al., 2021
Mehikoorma	455.866	19.4551	0.054269	TC/EA	Männik et al., 2021
Mehikoorma	455.692	18.3985	0.226511	TC/EA	Männik et al., 2021
Mehikoorma	455.518	18.9562	0.186558	TC/EA	Männik et al., 2021
Mehikoorma	455.396	18.8283	0.38249	TC/EA	Männik et al., 2021
Mehikoorma	455.306	18.7982	0.131463	TC/EA	Männik et al., 2021
Mehikoorma	455.126	18.9394	0.302002	TC/EA	Männik et al., 2021
Mehikoorma	454.987	19.3053	0.185776	TC/EA	Männik et al., 2021
Mehikoorma	454.757	18.61	0.158428	TC/EA	Männik et al., 2021
Mehikoorma	454.316	18.8388		TC/EA	Männik et al., 2021
Mehikoorma	454.091	19.3195	0.277249	TC/EA	Männik et al., 2021
Mehikoorma	453.886	18.556	0.138252	TC/EA	Männik et al., 2021
Mehikoorma	453.743	19.2775	0.363064	TC/EA	Männik et al., 2021
Mehikoorma	453.504	19.3008		TC/EA	Männik et al., 2021
Mehikoorma	453.053	19.0097		TC/EA	Männik et al., 2021
Mehikoorma	452.663	18.8312	0.319544	TC/EA	Männik et al., 2021
Mehikoorma	452.396	19.0674	0.0528092	TC/EA	Männik et al., 2021
Mehikoorma	452.125	18.6286		TC/EA	Männik et al., 2021
Mehikoorma	451.979	18.7844	0.242846	TC/EA	Männik et al., 2021
Mehikoorma	451.462	18.8294	0.23104	TC/EA	Männik et al., 2021
Mehikoorma	450.616	18.853	0.201393	TC/EA	Männik et al., 2021
Mehikoorma	450.324	19.5175	0.196725	TC/EA	Männik et al., 2021
Mehikoorma	450.286	18.8153	0.17163	TC/EA	Männik et al., 2021
Mehikoorma	450.251	18.9675	0.120344	TC/EA	Männik et al., 2021
Mehikoorma	449.986	19.3777	0.0162316	TC/EA	Männik et al., 2021
Mehikoorma	449.89	19.3342	0.083655	TC/EA	Männik et al., 2021
Mehikoorma	449.822	19.4542	0.201868	TC/EA	Männik et al., 2021
Mehikoorma	449.755	19.8729	0.313311	TC/EA	Männik et al., 2021
Mehikoorma	449.701	19.9728	0.154765	TC/EA	Männik et al., 2021
Mehikoorma	449.661	19.3095	0.00957247	TC/EA	Männik et al., 2021
Mehikoorma	449.701	18.8475	0.187627	TC/EA	Männik et al., 2021
Mehikoorma	449.431	19.2824	0.135673	TC/EA	Männik et al., 2021
Mehikoorma	449.386	18.702	0.359532	TC/EA	Männik et al., 2021
Mehikoorma	449.324	18.917	0.153725	TC/EA	Männik et al., 2021
Mehikoorma	449.283	19.3381		TC/EA	Männik et al., 2021
Mehikoorma	449.196	19.6882	0.0990173	TC/EA	Männik et al., 2021
Mehikoorma	449.135	19.4448	0.0162316	TC/EA	Männik et al., 2021
Mehikoorma	448.531	19.3296	0.22446	TC/EA	Männik et al., 2021
	443.25	18.29		SIMS	Grossman and Joachimski, 2020
	443.355	19		SIMS	Grossman and Joachimski, 2020
	443.46	18.98		SIMS	Grossman and Joachimski, 2020
	443.67	18.96		SIMS	Grossman and Joachimski, 2020
	445.459	18.01		SIMS	Grossman and Joachimski, 2020
	446.952	17.03		SIMS	Grossman and Joachimski, 2020
	446.952	18.13		SIMS	Grossman and Joachimski, 2020
	449.19	17.33		SIMS	Grossman and Joachimski, 2020
	452.981	17.06		SIMS	Grossman and Joachimski, 2020
	459.859	17.57		SIMS	Grossman and Joachimski, 2020
	463.743	17.7		SIMS	Grossman and Joachimski, 2020
	467.628	17.22		SIMS	Grossman and Joachimski, 2020
	469.829	17.11		SIMS	Grossman and Joachimski, 2020
	472.731	16.59		SIMS	Grossman and Joachimski, 2020
	474.88	15.72		SIMS	Grossman and Joachimski, 2020
	474.88	16.13		SIMS	Grossman and Joachimski, 2020
	476.599	16.17		SIMS	Grossman and Joachimski, 2020
	479.534	15.56		SIMS	Grossman and Joachimski, 2020
	485.557	15.03		SIMS	Grossman and Joachimski, 2020
	486.561	14.73		SIMS	Grossman and Joachimski, 2020
	443.013	16.9		TC/EA	Grossman and Joachimski, 2020
	443.083	17.4		TC/EA	Grossman and Joachimski, 2020
	443.16	18.5		TC/EA	Grossman and Joachimski, 2020
	443.25	18.7		TC/EA	Grossman and Joachimski, 2020
	443.34	18.1		TC/EA	Grossman and Joachimski, 2020
	443.43	17.3		TC/EA	Grossman and Joachimski, 2020
	443.52	17.3		TC/EA	Grossman and Joachimski, 2020
	443.61	17.5		TC/EA	Grossman and Joachimski, 2020
	443.7	17.7		TC/EA	Grossman and Joachimski, 2020
	445.492	17.47		TC/EA	Grossman and Joachimski, 2020
	445.492	18.06		TC/EA	Grossman and Joachimski, 2020
	445.492	18.49		TC/EA	Grossman and Joachimski, 2020
	445.492	20.14		TC/EA	Grossman and Joachimski, 2020
	445.492	17.92		TC/EA	Grossman and Joachimski, 2020
	445.492	19.05		TC/EA	Grossman and Joachimski, 2020
	445.492	18.31		TC/EA	Grossman and Joachimski, 2020
	445.492	19.79		TC/EA	Grossman and Joachimski, 2020
	445.492	19.57		TC/EA	Grossman and Joachimski, 2020
	445.492	19.92		TC/EA	Grossman and Joachimski, 2020
	445.492	18.83		TC/EA	Grossman and Joachimski, 2020
	445.492	19.23		TC/EA	Grossman and Joachimski, 2020
	445.492	19.92		TC/EA	Grossman and Joachimski, 2020
	445.541	18.4		TC/EA	Grossman and Joachimski, 2020
	445.541	17.9		TC/EA	Grossman and Joachimski, 2020
	445.541	18.3		TC/EA	Grossman and Joachimski, 2020
	445.59	17.7		TC/EA	Grossman and Joachimski, 2020
	445.59	17.8		TC/EA	Grossman and Joachimski, 2020
	445.59	18.2		TC/EA	Grossman and Joachimski, 2020
	445.687	18.9		TC/EA	Grossman and Joachimski, 2020
	445.687	18.9		TC/EA	Grossman and Joachimski, 2020
	445.785	17.8		TC/EA	Grossman and Joachimski, 2020
	445.785	18.1		TC/EA	Grossman and Joachimski, 2020
	445.868	17.4		TC/EA	Grossman and Joachimski, 2020
	446.119	18.7		TC/EA	Grossman and Joachimski, 2020
	446.119	17.4		TC/EA	Grossman and Joachimski, 2020
	446.119	18.3		TC/EA	Grossman and Joachimski, 2020
	446.369	18.2		TC/EA	Grossman and Joachimski, 2020
	446.467	18.8		TC/EA	Grossman and Joachimski, 2020
	446.467	18.4		TC/EA	Grossman and Joachimski, 2020
	446.467	18.4		TC/EA	Grossman and Joachimski, 2020
	446.467	17.04		TC/EA	Grossman and Joachimski, 2020
	446.467	19.22		TC/EA	Grossman and Joachimski, 2020
	446.536	17.1		TC/EA	Grossman and Joachimski, 2020
	446.536	18.3		TC/EA	Grossman and Joachimski, 2020
	446.536	18.7		TC/EA	Grossman and Joachimski, 2020
	446.536	16.6		TC/EA	Grossman and Joachimski, 2020
	446.87	17.8		TC/EA	Grossman and Joachimski, 2020
	446.87	18.2		TC/EA	Grossman and Joachimski, 2020
	446.87	17.9		TC/EA	Grossman and Joachimski, 2020
	447.118	18.5		TC/EA	Grossman and Joachimski, 2020
	447.223	18.1		TC/EA	Grossman and Joachimski, 2020
	447.223	17.4		TC/EA	Grossman and Joachimski, 2020
	447.29	17		TC/EA	Grossman and Joachimski, 2020
	447.29	18.3		TC/EA	Grossman and Joachimski, 2020
	447.491	18.4		TC/EA	Grossman and Joachimski, 2020
	447.693	16.8		TC/EA	Grossman and Joachimski, 2020
	447.76	17.5		TC/EA	Grossman and Joachimski, 2020
	447.928	17.66		TC/EA	Grossman and Joachimski, 2020
	448.231	17.9		TC/EA	Grossman and Joachimski, 2020
	449.132	17.3		TC/EA	Grossman and Joachimski, 2020
	449.19	17.9		TC/EA	Grossman and Joachimski, 2020
	449.19	21.8		TC/EA	Grossman and Joachimski, 2020
	449.362	17.3		TC/EA	Grossman and Joachimski, 2020
	449.362	16.8		TC/EA	Grossman and Joachimski, 2020
	449.362	19.3		TC/EA	Grossman and Joachimski, 2020
	449.362	18		TC/EA	Grossman and Joachimski, 2020
	449.362	18.3		TC/EA	Grossman and Joachimski, 2020
	449.362	18.4		TC/EA	Grossman and Joachimski, 2020
	449.362	18.3		TC/EA	Grossman and Joachimski, 2020
	449.362	17.6		TC/EA	Grossman and Joachimski, 2020
	449.362	18		TC/EA	Grossman and Joachimski, 2020
	449.39	18.61		TC/EA	Grossman and Joachimski, 2020
	449.39	17.89		TC/EA	Grossman and Joachimski, 2020
	449.39	18.31		TC/EA	Grossman and Joachimski, 2020
	449.39	18.65		TC/EA	Grossman and Joachimski, 2020
	449.39	18.27		TC/EA	Grossman and Joachimski, 2020
	449.39	18.39		TC/EA	Grossman and Joachimski, 2020
	449.39	18.86		TC/EA	Grossman and Joachimski, 2020
	449.39	18.78		TC/EA	Grossman and Joachimski, 2020
	449.592	17.9		TC/EA	Grossman and Joachimski, 2020
	449.592	18.3		TC/EA	Grossman and Joachimski, 2020
	449.592	17.5		TC/EA	Grossman and Joachimski, 2020
	449.821	17.6		TC/EA	Grossman and Joachimski, 2020
	449.821	18.1		TC/EA	Grossman and Joachimski, 2020
	450.051	18		TC/EA	Grossman and Joachimski, 2020
	450.051	18.8		TC/EA	Grossman and Joachimski, 2020
	450.051	17.9		TC/EA	Grossman and Joachimski, 2020
	450.051	18.7		TC/EA	Grossman and Joachimski, 2020
	450.051	17.3		TC/EA	Grossman and Joachimski, 2020
	450.051	17.5		TC/EA	Grossman and Joachimski, 2020
	450.281	18.5		TC/EA	Grossman and Joachimski, 2020
	450.281	18.2		TC/EA	Grossman and Joachimski, 2020
	450.281	18.8		TC/EA	Grossman and Joachimski, 2020
	450.51	17.6		TC/EA	Grossman and Joachimski, 2020
	450.51	18.4		TC/EA	Grossman and Joachimski, 2020
	450.51	17.7		TC/EA	Grossman and Joachimski, 2020
	450.51	18.2		TC/EA	Grossman and Joachimski, 2020
	450.51	17.4		TC/EA	Grossman and Joachimski, 2020
	450.51	17.6		TC/EA	Grossman and Joachimski, 2020
	450.51	18.5		TC/EA	Grossman and Joachimski, 2020
	450.51	18		TC/EA	Grossman and Joachimski, 2020
	450.51	18.5		TC/EA	Grossman and Joachimski, 2020
	450.74	19.4		TC/EA	Grossman and Joachimski, 2020
	450.74	18.1		TC/EA	Grossman and Joachimski, 2020
	450.74	17.8		TC/EA	Grossman and Joachimski, 2020
	450.74	18.1		TC/EA	Grossman and Joachimski, 2020
	450.74	17.7		TC/EA	Grossman and Joachimski, 2020
	450.74	18.9		TC/EA	Grossman and Joachimski, 2020
	450.74	18.3		TC/EA	Grossman and Joachimski, 2020
	450.74	18.4		TC/EA	Grossman and Joachimski, 2020
	451.199	17.9		TC/EA	Grossman and Joachimski, 2020
	451.199	18		TC/EA	Grossman and Joachimski, 2020
	451.429	17.4		TC/EA	Grossman and Joachimski, 2020
	451.429	18.7		TC/EA	Grossman and Joachimski, 2020
	451.659	17.3		TC/EA	Grossman and Joachimski, 2020
	451.659	17.8		TC/EA	Grossman and Joachimski, 2020
	451.659	18		TC/EA	Grossman and Joachimski, 2020
	451.659	18		TC/EA	Grossman and Joachimski, 2020
	451.777	19.1		TC/EA	Grossman and Joachimski, 2020
	451.826	18.7		TC/EA	Grossman and Joachimski, 2020
	451.888	18.1		TC/EA	Grossman and Joachimski, 2020
	451.888	18.2		TC/EA	Grossman and Joachimski, 2020
	451.923	18.9		TC/EA	Grossman and Joachimski, 2020
	452.034	18.2		TC/EA	Grossman and Joachimski, 2020
	452.071	18.5		TC/EA	Grossman and Joachimski, 2020
	452.118	18.3		TC/EA	Grossman and Joachimski, 2020
	452.145	19		TC/EA	Grossman and Joachimski, 2020
	452.22	18.1		TC/EA	Grossman and Joachimski, 2020
	452.257	18.3		TC/EA	Grossman and Joachimski, 2020
	452.313	18.7		TC/EA	Grossman and Joachimski, 2020
	452.313	18.8		TC/EA	Grossman and Joachimski, 2020
	452.313	18.7		TC/EA	Grossman and Joachimski, 2020
	452.313	18.1		TC/EA	Grossman and Joachimski, 2020
	452.313	18		TC/EA	Grossman and Joachimski, 2020
	452.313	18.9		TC/EA	Grossman and Joachimski, 2020
	452.313	18.7		TC/EA	Grossman and Joachimski, 2020
	452.313	17.96		TC/EA	Grossman and Joachimski, 2020
	452.313	17.5		TC/EA	Grossman and Joachimski, 2020
	452.313	17.44		TC/EA	Grossman and Joachimski, 2020
	452.313	17.15		TC/EA	Grossman and Joachimski, 2020
	452.313	19.04		TC/EA	Grossman and Joachimski, 2020
	452.313	18.14		TC/EA	Grossman and Joachimski, 2020
	452.313	16.7		TC/EA	Grossman and Joachimski, 2020
	452.313	17.54		TC/EA	Grossman and Joachimski, 2020
	452.313	17.67		TC/EA	Grossman and Joachimski, 2020
	452.313	19		TC/EA	Grossman and Joachimski, 2020
	452.313	17.08		TC/EA	Grossman and Joachimski, 2020
	452.313	18.4		TC/EA	Grossman and Joachimski, 2020
	452.313	19.2		TC/EA	Grossman and Joachimski, 2020
	452.313	18.7		TC/EA	Grossman and Joachimski, 2020
	452.313	18.4		TC/EA	Grossman and Joachimski, 2020
	452.313	18.2		TC/EA	Grossman and Joachimski, 2020
	452.313	18.9		TC/EA	Grossman and Joachimski, 2020
	452.313	18.5		TC/EA	Grossman and Joachimski, 2020
	452.313	19.2		TC/EA	Grossman and Joachimski, 2020
	452.313	19.2		TC/EA	Grossman and Joachimski, 2020
	452.313	18.9		TC/EA	Grossman and Joachimski, 2020
	452.313	18.68		TC/EA	Grossman and Joachimski, 2020
	452.313	17.07		TC/EA	Grossman and Joachimski, 2020
	452.313	18.39		TC/EA	Grossman and Joachimski, 2020
	452.313	18.45		TC/EA	Grossman and Joachimski, 2020
	452.313	16.58		TC/EA	Grossman and Joachimski, 2020
	452.313	18.72		TC/EA	Grossman and Joachimski, 2020
	452.313	18.91		TC/EA	Grossman and Joachimski, 2020
	452.313	18.92		TC/EA	Grossman and Joachimski, 2020
	452.331	18		TC/EA	Grossman and Joachimski, 2020
	452.368	18.2		TC/EA	Grossman and Joachimski, 2020
	452.368	19.1		TC/EA	Grossman and Joachimski, 2020
	452.405	18.9		TC/EA	Grossman and Joachimski, 2020
	452.405	18.8		TC/EA	Grossman and Joachimski, 2020
	452.442	19.3		TC/EA	Grossman and Joachimski, 2020
	452.479	18.8		TC/EA	Grossman and Joachimski, 2020
	452.479	18.7		TC/EA	Grossman and Joachimski, 2020
	452.516	18.6		TC/EA	Grossman and Joachimski, 2020
	452.516	19.3		TC/EA	Grossman and Joachimski, 2020
	452.516	19.2		TC/EA	Grossman and Joachimski, 2020
	452.553	18.6		TC/EA	Grossman and Joachimski, 2020
	452.59	18.5		TC/EA	Grossman and Joachimski, 2020
	452.627	18.3		TC/EA	Grossman and Joachimski, 2020
	452.664	18.9		TC/EA	Grossman and Joachimski, 2020
	452.664	19		TC/EA	Grossman and Joachimski, 2020
	452.664	18.3		TC/EA	Grossman and Joachimski, 2020
	452.664	18.9		TC/EA	Grossman and Joachimski, 2020
	452.664	18.2		TC/EA	Grossman and Joachimski, 2020
	452.664	18.3		TC/EA	Grossman and Joachimski, 2020
	452.664	18.1		TC/EA	Grossman and Joachimski, 2020
	452.664	18.8		TC/EA	Grossman and Joachimski, 2020
	452.664	18.5		TC/EA	Grossman and Joachimski, 2020
	452.664	18.5		TC/EA	Grossman and Joachimski, 2020
	452.664	19		TC/EA	Grossman and Joachimski, 2020
	452.664	18.2		TC/EA	Grossman and Joachimski, 2020
	452.664	19.2		TC/EA	Grossman and Joachimski, 2020
	452.664	19.1		TC/EA	Grossman and Joachimski, 2020
	452.664	19.3		TC/EA	Grossman and Joachimski, 2020
	452.664	19.5		TC/EA	Grossman and Joachimski, 2020
	452.664	18.9		TC/EA	Grossman and Joachimski, 2020
	452.664	18.9		TC/EA	Grossman and Joachimski, 2020
	452.664	19.3		TC/EA	Grossman and Joachimski, 2020
	452.664	19.1		TC/EA	Grossman and Joachimski, 2020
	452.664	18.9		TC/EA	Grossman and Joachimski, 2020
	452.664	18.9		TC/EA	Grossman and Joachimski, 2020
	452.664	18.9		TC/EA	Grossman and Joachimski, 2020
	452.664	19.7		TC/EA	Grossman and Joachimski, 2020
	452.664	19		TC/EA	Grossman and Joachimski, 2020
	452.664	18.8		TC/EA	Grossman and Joachimski, 2020
	452.664	18.9		TC/EA	Grossman and Joachimski, 2020
	452.664	19.4		TC/EA	Grossman and Joachimski, 2020
	452.664	19.1		TC/EA	Grossman and Joachimski, 2020
	452.664	18.8		TC/EA	Grossman and Joachimski, 2020
	452.664	18.4		TC/EA	Grossman and Joachimski, 2020
	452.664	18.4		TC/EA	Grossman and Joachimski, 2020
	452.664	19		TC/EA	Grossman and Joachimski, 2020
	452.664	19.1		TC/EA	Grossman and Joachimski, 2020
	452.664	18.8		TC/EA	Grossman and Joachimski, 2020
	452.664	19.5		TC/EA	Grossman and Joachimski, 2020
	452.664	19.2		TC/EA	Grossman and Joachimski, 2020
	452.664	18.8		TC/EA	Grossman and Joachimski, 2020
	452.664	19.5		TC/EA	Grossman and Joachimski, 2020
	452.664	19.8		TC/EA	Grossman and Joachimski, 2020
	452.664	19.1		TC/EA	Grossman and Joachimski, 2020
	452.664	19.4		TC/EA	Grossman and Joachimski, 2020
	452.664	18.9		TC/EA	Grossman and Joachimski, 2020
	452.664	19.3		TC/EA	Grossman and Joachimski, 2020
	452.664	19.6		TC/EA	Grossman and Joachimski, 2020
	452.664	18.6		TC/EA	Grossman and Joachimski, 2020
	452.664	19		TC/EA	Grossman and Joachimski, 2020
	452.664	19.7		TC/EA	Grossman and Joachimski, 2020
	452.664	19.2		TC/EA	Grossman and Joachimski, 2020
	452.664	19.4		TC/EA	Grossman and Joachimski, 2020
	452.664	19.1		TC/EA	Grossman and Joachimski, 2020
	452.664	19.1		TC/EA	Grossman and Joachimski, 2020
	452.664	18.8		TC/EA	Grossman and Joachimski, 2020
	452.664	19.1		TC/EA	Grossman and Joachimski, 2020
	452.664	19.1		TC/EA	Grossman and Joachimski, 2020
	452.664	19		TC/EA	Grossman and Joachimski, 2020
	452.664	19.1		TC/EA	Grossman and Joachimski, 2020
	452.664	19.1		TC/EA	Grossman and Joachimski, 2020
	452.703	19.3		TC/EA	Grossman and Joachimski, 2020
	452.703	18.7		TC/EA	Grossman and Joachimski, 2020
	452.703	18.8		TC/EA	Grossman and Joachimski, 2020
	452.703	18.3		TC/EA	Grossman and Joachimski, 2020
	452.703	18.6		TC/EA	Grossman and Joachimski, 2020
	452.703	18.5		TC/EA	Grossman and Joachimski, 2020
	452.703	18.2		TC/EA	Grossman and Joachimski, 2020
	452.703	19.1		TC/EA	Grossman and Joachimski, 2020
	452.703	19		TC/EA	Grossman and Joachimski, 2020
	452.703	18.1		TC/EA	Grossman and Joachimski, 2020
	452.703	18.7		TC/EA	Grossman and Joachimski, 2020
	452.703	18.8		TC/EA	Grossman and Joachimski, 2020
	452.703	18.8		TC/EA	Grossman and Joachimski, 2020
	452.703	18.8		TC/EA	Grossman and Joachimski, 2020
	452.703	18.9		TC/EA	Grossman and Joachimski, 2020
	452.703	18.7		TC/EA	Grossman and Joachimski, 2020
	452.703	18		TC/EA	Grossman and Joachimski, 2020
	452.703	19.2		TC/EA	Grossman and Joachimski, 2020
	452.703	19.3		TC/EA	Grossman and Joachimski, 2020
	452.703	19.3		TC/EA	Grossman and Joachimski, 2020
	452.703	19.2		TC/EA	Grossman and Joachimski, 2020
	452.703	19.4		TC/EA	Grossman and Joachimski, 2020
	452.703	19.2		TC/EA	Grossman and Joachimski, 2020
	452.703	18.7		TC/EA	Grossman and Joachimski, 2020
	452.703	19		TC/EA	Grossman and Joachimski, 2020
	452.703	19.1		TC/EA	Grossman and Joachimski, 2020
	452.703	19.2		TC/EA	Grossman and Joachimski, 2020
	452.703	18.6		TC/EA	Grossman and Joachimski, 2020
	452.703	19.5		TC/EA	Grossman and Joachimski, 2020
	452.703	19		TC/EA	Grossman and Joachimski, 2020
	452.703	19		TC/EA	Grossman and Joachimski, 2020
	452.703	19.5		TC/EA	Grossman and Joachimski, 2020
	452.703	19		TC/EA	Grossman and Joachimski, 2020
	452.703	19.5		TC/EA	Grossman and Joachimski, 2020
	452.703	18.7		TC/EA	Grossman and Joachimski, 2020
	452.703	18		TC/EA	Grossman and Joachimski, 2020
	452.703	19.1		TC/EA	Grossman and Joachimski, 2020
	452.703	19.2		TC/EA	Grossman and Joachimski, 2020
	452.703	18.9		TC/EA	Grossman and Joachimski, 2020
	452.703	19.7		TC/EA	Grossman and Joachimski, 2020
	452.703	18.8		TC/EA	Grossman and Joachimski, 2020
	452.703	18.4		TC/EA	Grossman and Joachimski, 2020
	452.703	18.8		TC/EA	Grossman and Joachimski, 2020
	452.703	18.6		TC/EA	Grossman and Joachimski, 2020
	452.703	18.9		TC/EA	Grossman and Joachimski, 2020
	452.703	18.8		TC/EA	Grossman and Joachimski, 2020
	452.703	18.8		TC/EA	Grossman and Joachimski, 2020
	452.703	18.9		TC/EA	Grossman and Joachimski, 2020
	452.703	18.5		TC/EA	Grossman and Joachimski, 2020
	452.703	18.8		TC/EA	Grossman and Joachimski, 2020
	452.703	18.5		TC/EA	Grossman and Joachimski, 2020
	452.703	19.3		TC/EA	Grossman and Joachimski, 2020
	452.703	18.9		TC/EA	Grossman and Joachimski, 2020
	452.703	18.4		TC/EA	Grossman and Joachimski, 2020
	452.703	18.8		TC/EA	Grossman and Joachimski, 2020
	452.703	19.1		TC/EA	Grossman and Joachimski, 2020
	452.703	19.7		TC/EA	Grossman and Joachimski, 2020
	452.703	18.8		TC/EA	Grossman and Joachimski, 2020
	452.703	18.3		TC/EA	Grossman and Joachimski, 2020
	452.703	19.4		TC/EA	Grossman and Joachimski, 2020
	452.703	19.1		TC/EA	Grossman and Joachimski, 2020
	452.703	18.7		TC/EA	Grossman and Joachimski, 2020
	452.703	19.1		TC/EA	Grossman and Joachimski, 2020
	452.703	19.3		TC/EA	Grossman and Joachimski, 2020
	452.703	18.9		TC/EA	Grossman and Joachimski, 2020
	452.703	18.3		TC/EA	Grossman and Joachimski, 2020
	452.703	18.5		TC/EA	Grossman and Joachimski, 2020
	452.703	18.8		TC/EA	Grossman and Joachimski, 2020
	452.703	19.3		TC/EA	Grossman and Joachimski, 2020
	452.703	19.1		TC/EA	Grossman and Joachimski, 2020
	452.703	19.1		TC/EA	Grossman and Joachimski, 2020
	452.703	18.6		TC/EA	Grossman and Joachimski, 2020
	452.703	19.1		TC/EA	Grossman and Joachimski, 2020
	452.703	19.1		TC/EA	Grossman and Joachimski, 2020
	452.703	18.7		TC/EA	Grossman and Joachimski, 2020
	452.703	19.5		TC/EA	Grossman and Joachimski, 2020
	452.703	18.7		TC/EA	Grossman and Joachimski, 2020
	452.703	19		TC/EA	Grossman and Joachimski, 2020
	452.703	18.3		TC/EA	Grossman and Joachimski, 2020
	452.703	19.4		TC/EA	Grossman and Joachimski, 2020
	452.703	17.8		TC/EA	Grossman and Joachimski, 2020
	452.703	17.6		TC/EA	Grossman and Joachimski, 2020
	452.703	17.9		TC/EA	Grossman and Joachimski, 2020
	452.703	17.5		TC/EA	Grossman and Joachimski, 2020
	452.703	17.2		TC/EA	Grossman and Joachimski, 2020
	452.703	16.9		TC/EA	Grossman and Joachimski, 2020
	452.703	18		TC/EA	Grossman and Joachimski, 2020
	452.703	17.7		TC/EA	Grossman and Joachimski, 2020
	452.703	17.7		TC/EA	Grossman and Joachimski, 2020
	452.703	17.7		TC/EA	Grossman and Joachimski, 2020
	452.703	17.9		TC/EA	Grossman and Joachimski, 2020
	452.703	16.6		TC/EA	Grossman and Joachimski, 2020
	452.703	17.5		TC/EA	Grossman and Joachimski, 2020
	452.703	16.1		TC/EA	Grossman and Joachimski, 2020
	452.703	17.6		TC/EA	Grossman and Joachimski, 2020
	452.703	17		TC/EA	Grossman and Joachimski, 2020
	452.703	18.3		TC/EA	Grossman and Joachimski, 2020
	452.703	17.9		TC/EA	Grossman and Joachimski, 2020
	452.703	18		TC/EA	Grossman and Joachimski, 2020
	452.703	17.9		TC/EA	Grossman and Joachimski, 2020
	452.703	18.1		TC/EA	Grossman and Joachimski, 2020
	452.703	19.1		TC/EA	Grossman and Joachimski, 2020
	452.703	18.4		TC/EA	Grossman and Joachimski, 2020
	452.703	18.4		TC/EA	Grossman and Joachimski, 2020
	452.703	18.1		TC/EA	Grossman and Joachimski, 2020
	452.703	18.1		TC/EA	Grossman and Joachimski, 2020
	452.703	17.8		TC/EA	Grossman and Joachimski, 2020
	452.703	17.3		TC/EA	Grossman and Joachimski, 2020
	452.703	19.7		TC/EA	Grossman and Joachimski, 2020
	452.703	19.1		TC/EA	Grossman and Joachimski, 2020
	452.726	18.2		TC/EA	Grossman and Joachimski, 2020
	452.726	18.7		TC/EA	Grossman and Joachimski, 2020
	452.763	17.9		TC/EA	Grossman and Joachimski, 2020
	452.763	18.1		TC/EA	Grossman and Joachimski, 2020
	452.8	18.9		TC/EA	Grossman and Joachimski, 2020
	452.85	18.2		TC/EA	Grossman and Joachimski, 2020
	452.85	18.9		TC/EA	Grossman and Joachimski, 2020
	452.85	18.5		TC/EA	Grossman and Joachimski, 2020
	452.886	17.8		TC/EA	Grossman and Joachimski, 2020
	452.886	18.8		TC/EA	Grossman and Joachimski, 2020
	452.886	19.3		TC/EA	Grossman and Joachimski, 2020
	452.921	18.1		TC/EA	Grossman and Joachimski, 2020
	452.921	18.6		TC/EA	Grossman and Joachimski, 2020
	452.957	18.7		TC/EA	Grossman and Joachimski, 2020
	452.957	18.4		TC/EA	Grossman and Joachimski, 2020
	452.992	18.5		TC/EA	Grossman and Joachimski, 2020
	452.992	18.3		TC/EA	Grossman and Joachimski, 2020
	452.992	18.6		TC/EA	Grossman and Joachimski, 2020
	453.028	17.7		TC/EA	Grossman and Joachimski, 2020
	453.064	17.6		TC/EA	Grossman and Joachimski, 2020
	453.064	18.3		TC/EA	Grossman and Joachimski, 2020
	453.099	17.9		TC/EA	Grossman and Joachimski, 2020
	453.135	17.7		TC/EA	Grossman and Joachimski, 2020
	453.135	18.2		TC/EA	Grossman and Joachimski, 2020
	453.206	18.6		TC/EA	Grossman and Joachimski, 2020
	453.3	19		TC/EA	Grossman and Joachimski, 2020
	453.4	18.7		TC/EA	Grossman and Joachimski, 2020
	453.462	18.6		TC/EA	Grossman and Joachimski, 2020
	453.5	18.5		TC/EA	Grossman and Joachimski, 2020
	453.5	19.3		TC/EA	Grossman and Joachimski, 2020
	453.503	19		TC/EA	Grossman and Joachimski, 2020
	453.538	18.8		TC/EA	Grossman and Joachimski, 2020
	453.538	19.1		TC/EA	Grossman and Joachimski, 2020
	453.55	18.8		TC/EA	Grossman and Joachimski, 2020
	453.55	18.6		TC/EA	Grossman and Joachimski, 2020
	453.9	18.3		TC/EA	Grossman and Joachimski, 2020
	453.9	18		TC/EA	Grossman and Joachimski, 2020
	453.9	18.3		TC/EA	Grossman and Joachimski, 2020
	453.9	19.3		TC/EA	Grossman and Joachimski, 2020
	453.9	18.7		TC/EA	Grossman and Joachimski, 2020
	453.9	19.5		TC/EA	Grossman and Joachimski, 2020
	453.9	19.1		TC/EA	Grossman and Joachimski, 2020
	453.9	19		TC/EA	Grossman and Joachimski, 2020
	453.9	19.1		TC/EA	Grossman and Joachimski, 2020
	453.9	18.6		TC/EA	Grossman and Joachimski, 2020
	453.9	18.8		TC/EA	Grossman and Joachimski, 2020
	453.9	18.3		TC/EA	Grossman and Joachimski, 2020
	453.9	19.5		TC/EA	Grossman and Joachimski, 2020
	453.9	19		TC/EA	Grossman and Joachimski, 2020
	453.9	19		TC/EA	Grossman and Joachimski, 2020
	454.8	19.1		TC/EA	Grossman and Joachimski, 2020
	454.8	18.9104		TC/EA	Grossman and Joachimski, 2020
	456.8	17.2449		TC/EA	Grossman and Joachimski, 2020
	456.877	18.4752		TC/EA	Grossman and Joachimski, 2020
	456.877	18.6785		TC/EA	Grossman and Joachimski, 2020
	456.877	18.9854		TC/EA	Grossman and Joachimski, 2020
	456.882	15.055		TC/EA	Grossman and Joachimski, 2020
	456.882	18.9878		TC/EA	Grossman and Joachimski, 2020
	456.882	17.9256		TC/EA	Grossman and Joachimski, 2020
	456.889	18.5927		TC/EA	Grossman and Joachimski, 2020
	456.889	18.5634		TC/EA	Grossman and Joachimski, 2020
	456.895	18.9878		TC/EA	Grossman and Joachimski, 2020
	456.903	18.2268		TC/EA	Grossman and Joachimski, 2020
	456.903	18.2268		TC/EA	Grossman and Joachimski, 2020
	456.903	17.9634		TC/EA	Grossman and Joachimski, 2020
	456.903	18.2265		TC/EA	Grossman and Joachimski, 2020
	456.903	18.6312		TC/EA	Grossman and Joachimski, 2020
	456.906	19.37		TC/EA	Grossman and Joachimski, 2020
	456.906	18.2888		TC/EA	Grossman and Joachimski, 2020
	456.906	18.8086		TC/EA	Grossman and Joachimski, 2020
	456.907	18.2505		TC/EA	Grossman and Joachimski, 2020
	456.907	18.6146		TC/EA	Grossman and Joachimski, 2020
	456.91	18.1049		TC/EA	Grossman and Joachimski, 2020
	456.91	18.6583		TC/EA	Grossman and Joachimski, 2020
	456.91	17.8572		TC/EA	Grossman and Joachimski, 2020
	456.91	18.134		TC/EA	Grossman and Joachimski, 2020
	456.91	18.4981		TC/EA	Grossman and Joachimski, 2020
	456.92	18.9068		TC/EA	Grossman and Joachimski, 2020
	456.921	18.6184		TC/EA	Grossman and Joachimski, 2020
	456.921	18.4941		TC/EA	Grossman and Joachimski, 2020
	456.931	19.3288		TC/EA	Grossman and Joachimski, 2020
	456.931	19.1495		TC/EA	Grossman and Joachimski, 2020
	456.931	19.1764		TC/EA	Grossman and Joachimski, 2020
	456.931	18.5731		TC/EA	Grossman and Joachimski, 2020
	456.936	18.2153		TC/EA	Grossman and Joachimski, 2020
	456.939	18.6933		TC/EA	Grossman and Joachimski, 2020
	456.94	18.7195		TC/EA	Grossman and Joachimski, 2020
	458.955	17.1606		TC/EA	Grossman and Joachimski, 2020
	458.955	17.3415		TC/EA	Grossman and Joachimski, 2020
	462.73	17.0178		TC/EA	Grossman and Joachimski, 2020
	462.966	17.7		TC/EA	Grossman and Joachimski, 2020
	462.966	17.4		TC/EA	Grossman and Joachimski, 2020
	462.966	17.5		TC/EA	Grossman and Joachimski, 2020
	462.966	16.9		TC/EA	Grossman and Joachimski, 2020
	463.989	16.0173		TC/EA	Grossman and Joachimski, 2020
	465.247	16.2169		TC/EA	Grossman and Joachimski, 2020
	466.506	16.6236		TC/EA	Grossman and Joachimski, 2020
	466.506	16.9736		TC/EA	Grossman and Joachimski, 2020
	466.506	17.3628		TC/EA	Grossman and Joachimski, 2020
	467.764	17.3441		TC/EA	Grossman and Joachimski, 2020
	469.829	16.3		TC/EA	Grossman and Joachimski, 2020
	469.893	16.5968		TC/EA	Grossman and Joachimski, 2020
	469.893	16.4949		TC/EA	Grossman and Joachimski, 2020
	470.948	16.8279		TC/EA	Grossman and Joachimski, 2020
	471.3	16.6116		TC/EA	Grossman and Joachimski, 2020
	472.053	16.0089		TC/EA	Grossman and Joachimski, 2020
	472.053	16.2498		TC/EA	Grossman and Joachimski, 2020
	472.053	16.5256		TC/EA	Grossman and Joachimski, 2020
	472.806	15.9518		TC/EA	Grossman and Joachimski, 2020
	473.161	15.6		TC/EA	Grossman and Joachimski, 2020
	473.56	17.0989		TC/EA	Grossman and Joachimski, 2020
	473.56	15.64		TC/EA	Grossman and Joachimski, 2020
	474.313	15.9254		TC/EA	Grossman and Joachimski, 2020
	475.066	16.1518		TC/EA	Grossman and Joachimski, 2020
	475.066	16.4734		TC/EA	Grossman and Joachimski, 2020
	475.819	15.86		TC/EA	Grossman and Joachimski, 2020
	476.573	16.8471		TC/EA	Grossman and Joachimski, 2020
	477.482	15.58		TC/EA	Grossman and Joachimski, 2020
	477.482	16.6172		TC/EA	Grossman and Joachimski, 2020
	478.373	16.25		TC/EA	Grossman and Joachimski, 2020
	478.531	15.1		TC/EA	Grossman and Joachimski, 2020
	478.755	16.1309		TC/EA	Grossman and Joachimski, 2020
	479.009	16.38		TC/EA	Grossman and Joachimski, 2020
	479.391	15.73		TC/EA	Grossman and Joachimski, 2020
	479.645	16.01		TC/EA	Grossman and Joachimski, 2020
	480.027	15.81		TC/EA	Grossman and Joachimski, 2020
	480.027	16.8519		TC/EA	Grossman and Joachimski, 2020
	480.524	16.7		TC/EA	Grossman and Joachimski, 2020
	480.549	15.6		TC/EA	Grossman and Joachimski, 2020
	480.562	15.8		TC/EA	Grossman and Joachimski, 2020
	480.689	16.2		TC/EA	Grossman and Joachimski, 2020
	480.74	16.1		TC/EA	Grossman and Joachimski, 2020
	480.753	16.3		TC/EA	Grossman and Joachimski, 2020
	480.765	16.6		TC/EA	Grossman and Joachimski, 2020
	480.778	15.7		TC/EA	Grossman and Joachimski, 2020
	480.791	16.3		TC/EA	Grossman and Joachimski, 2020
	480.791	15.45		TC/EA	Grossman and Joachimski, 2020
	481.3	14.7		TC/EA	Grossman and Joachimski, 2020
	481.3	14.8		TC/EA	Grossman and Joachimski, 2020
	481.3	14.9		TC/EA	Grossman and Joachimski, 2020
	481.3	15.2		TC/EA	Grossman and Joachimski, 2020
	481.3	15.3		TC/EA	Grossman and Joachimski, 2020
	481.3	15.4		TC/EA	Grossman and Joachimski, 2020
	481.3	15.4		TC/EA	Grossman and Joachimski, 2020
	481.3	15.7		TC/EA	Grossman and Joachimski, 2020
	481.3	15.8		TC/EA	Grossman and Joachimski, 2020
	481.3	15.74		TC/EA	Grossman and Joachimski, 2020
	481.936	15.44		TC/EA	Grossman and Joachimski, 2020
	482.573	15.36		TC/EA	Grossman and Joachimski, 2020
	483.336	15.89		TC/EA	Grossman and Joachimski, 2020
	484.227	15.76		TC/EA	Grossman and Joachimski, 2020
	485.118	15.39		TC/EA	Grossman and Joachimski, 2020
	485.118	16.3302		TC/EA	Grossman and Joachimski, 2020
	486.645	15.54		TC/EA	Grossman and Joachimski, 2020

## Sheet: G49860
Conwell, C.T., et al., 2022, Nd isotopic evidence for enhanced mafic weathering leading to Ordovician cooling: Geology, v. 50, https://doi.org/10.1130/G49860.1
